# Supplementary material for: New Pattern of Emerging Somatic Mutations in Optimal Responders Following Tyrosine Kinase Inhibitor Therapy in Chronic Myeloid Leukemia Patients
Source: Research Square preprint supplement (doi:10.21203/rs.3.rs-7924728/v1), 2025-11-05
Supplement: Supplementary file 1 [file 18734988fa96ea6ca8a1fccf.docx]

**Supplementary** **Table 1. Summary of patients with Pattern 3 (mutation clearance with mixed clinical outcomes)**

| **Case. No** | **Response to TKI** | **Gene** | **T1** | **T2** | **VAF1** | **VAF2** | **DT (days)** |
| --- | --- | --- | --- | --- | --- | --- | --- |
| 16* | Optimal | *DNMT3A* | 0 | 415 | 0.546 | 0.007 | -83.6 |
| 17 | Optimal | *BCOR* | 0 | 372 | 0.039 | ND | -70.4 |
| 19 | Optimal | *ASXL1* | 0 | 372 | 0.190 | ND | -49.1 |
| 37** | Optimal | *SMC1A* | 0 | 63 | 0.034 | ND | -12.4 |
| 44 | Suboptimal | *TET2* | 0 | 175 | 0.031 | ND | -35.2 |
| 45 | Suboptimal | *TP53* | 0 | 463 | 0.039 | ND | -87.5 |
| 46# | Suboptimal | *IKZF1* | -4 | 667 | 0.066 | ND | -110.9 |
| 51 | Optimal | *ASXL1* | 10 | 4565 | 0.045 | ND | -829 |
| 51 | Optimal | *FLT3* | 10 | 4565 | 0.029 | ND | -933.3 |
| 51 | Optimal | *JAK2* | 10 | 4565 | 0.037 | ND | -874.1 |
| 51 | Optimal | *TET2* | 10 | 4565 | 0.020 | ND | -1049.5 |

*Abbreviations: NE, not evaluable; T1, time of initial analysis (days from diagnosis); T2, time of second analysis (days from diagnosis); VAF1, variant allele frequency at T1; VAF2, variant allele frequency at T2; ND, not detected

#T315I mutation detected

* Patient has 2 different mutational dynamic patterns – mutation clearance (pattern 3) and emergence of a new mutation in PHF6

** Patient has 2 different mutational dynamic patterns – mutation clearance (pattern 3) and persistent mutation in *DNMT3A* (pattern 1)
